# Supplementary material for: Controllable spin direction in nonmagnetic BX/MX2 (M = Mo or W; X = S, Se and Te) van der Waals heterostructures by switching between the Rashba splitting and valley polarization
Source: Royal Society of Chemistry journal article supplement (doi:10.1039/d1tc03662a), 2021-11-25
Supplement: d1tc03662a1.pdf [file d1tc03662a1.pdf]

## Supplementary Information

### **Controllable spin direction in nonmagnetic BX/MX<sub>2</sub> (*M* = Mo or W; *X* = S, Se and Te) van der Waals heterostructures by switching between the Rashba splitting and valley polarization**

Dongxue Zhang, Baozeng Zhou\*

*Tianjin Key Laboratory of Film Electronic & Communicate Devices, School of Integrated Circuit Science and Engineering, Tianjin University of Technology, Tianjin 300384, China*

\*Corresponding Authors

[baozeng@tju.edu.cn](mailto:baozeng@tju.edu.cn) (B. Zhou)

**Table S1.** Lattice constants  $a$ , interlayer distances  $d_i$ , and binding energies  $E_b$  of the heterostructures. (Lattice constants  $a_0$  of isolated components are also listed.)

| monolayer                                 | $a_0$ (Å)   | heterostructure             |         |           |                  |
|-------------------------------------------|-------------|-----------------------------|---------|-----------|------------------|
|                                           |             | e                           | $a$ (Å) | $d_i$ (Å) | $E_b$ (meV/atom) |
| <b>BS</b>                                 | 3.04        | <b>BS/MoS<sub>2</sub></b>   | 3.09    | 3.24      | -184.24          |
| <b>BSe</b>                                | 3.25        | <b>BSe/MoSe<sub>2</sub></b> | 3.27    | 3.28      | -231.31          |
| <b>BTe</b>                                | 3.56        | <b>BTe/MoTe<sub>2</sub></b> | 3.54    | 3.44      | -289.61          |
| <b>MoS<sub>2</sub> (WS<sub>2</sub>)</b>   | 3.18 (3.18) | <b>BS/WS<sub>2</sub></b>    | 3.09    | 3.17      | -230.42          |
| <b>MoSe<sub>2</sub> (WSe<sub>2</sub>)</b> | 3.31 (3.32) | <b>BSe/WSe<sub>2</sub></b>  | 3.27    | 3.23      | -283.62          |
| <b>MoTe<sub>2</sub> (WTe<sub>2</sub>)</b> | 3.54 (3.55) | <b>BTe/WTe<sub>2</sub></b>  | 3.55    | 3.40      | -366.01          |

**Table S2.** Calculated total energies of different stackings at one lattice parameter for each heterostructures.

| <b>Energy (eV)</b> | <b>BS/MoS<sub>2</sub></b> | <b>BSe/MoSe<sub>2</sub></b> | <b>BTe/MoTe<sub>2</sub></b> | <b>BS/WS<sub>2</sub></b> | <b>BSe/WSe<sub>2</sub></b> | <b>BTe/WTe<sub>2</sub></b> |
|--------------------|---------------------------|-----------------------------|-----------------------------|--------------------------|----------------------------|----------------------------|
| <b>model-1</b>     | -46.23                    | -42.56                      | -38.93                      | -48.47                   | -44.63                     | -40.92                     |
| <b>model-2</b>     | -46.19                    | -42.49                      | -36.39                      | -48.41                   | -44.54                     | -40.77                     |
| <b>model-3</b>     | 46.19                     | -43.14                      | -37.69                      | -48.41                   | -44.54                     | -40.77                     |
| <b>model-4</b>     | -46.23                    | -42.56                      | -37.87                      | -48.47                   | -44.63                     | -40.91                     |
| <b>model-5</b>     | -46.22                    | -42.10                      | -36.47                      | -48.45                   | -44.61                     | -40.88                     |
| <b>model-6</b>     | -46.22                    | -42.55                      | -37.83                      | -48.46                   | -44.61                     | -40.89                     |

**Table S3.** The lattice vectors and fractional coordinates of each atom in BS/MoS<sub>2</sub> heterostructure.

|             |                     |                    |                     |
|-------------|---------------------|--------------------|---------------------|
| <b>a[Å]</b> | 3.0999765097565208  | 0.0000000000000000 | 0.0000000000000000  |
| <b>b[Å]</b> | -1.5499882548782604 | 2.6846584085841654 | 0.0000000000000000  |
| <b>c[Å]</b> | 0.0000000000000000  | 0.0000000000000000 | 24.4062017834956606 |
| <b>B</b>    | 0.0000000000000000  | 0.0000000000000000 | 0.3690911230892504  |
| <b>B</b>    | 0.0000000000000000  | 0.0000000000000000 | 0.4399551662415191  |
| <b>S</b>    | 0.0000000000000000  | 0.0000000000000000 | 0.6073435963586175  |
| <b>S</b>    | 0.0000000000000000  | 0.0000000000000000 | 0.7376220617021688  |
| <b>S</b>    | 0.6666666666666643  | 0.3333333333333357 | 0.4742822061758061  |
| <b>S</b>    | 0.6666666666666643  | 0.3333333333333357 | 0.3346992706543919  |
| <b>Mo</b>   | 0.6666666666666643  | 0.3333333333333357 | 0.6724766687782417  |

**Table S4.** The lattice vectors and fractional coordinates of each atom in BSe/MoSe<sub>2</sub> heterostructure.

|             |                     |                    |                     |
|-------------|---------------------|--------------------|---------------------|
| <b>a[Å]</b> | 3.2739599254763521  | 0.0000000000000000 | 0.0000000000000000  |
| <b>b[Å]</b> | -1.6369799627381760 | 2.8353324664347279 | 0.0000000000000000  |
| <b>c[Å]</b> | 0.0000000000000000  | 0.0000000000000000 | 25.2587157589132829 |
| <b>B</b>    | 0.0000000000000000  | 0.0000000000000000 | 0.3706362771015206  |
| <b>B</b>    | 0.0000000000000000  | 0.0000000000000000 | 0.4384657746545306  |
| <b>Se</b>   | 0.0000000000000000  | 0.0000000000000000 | 0.6058846986213524  |
| <b>Se</b>   | 0.0000000000000000  | 0.0000000000000000 | 0.7389862320690154  |
| <b>Se</b>   | 0.6666666666666643  | 0.3333333333333357 | 0.4756967533995727  |
| <b>Se</b>   | 0.6666666666666643  | 0.3333333333333357 | 0.3333582288307598  |
| <b>Mo</b>   | 0.6666666666666643  | 0.3333333333333357 | 0.6724421283232440  |

**Table S5.** The lattice vectors and fractional coordinates of each atom in BTe/MoTe<sub>2</sub> heterostructure.

|             |                     |                    |                     |
|-------------|---------------------|--------------------|---------------------|
| <b>a[Å]</b> | 3.5440649812321912  | 0.0000000000000000 | 0.0000000000000000  |
| <b>b[Å]</b> | -1.7720324906160956 | 3.0692503064098977 | 0.0000000000000000  |
| <b>c[Å]</b> | 0.0000000000000000  | 0.0000000000000000 | 26.6248924058081933 |
| <b>B</b>    | 0.0000000000000000  | 0.0000000000000000 | 0.3718825139895851  |
| <b>B</b>    | 0.0000000000000000  | 0.0000000000000000 | 0.4361139077195755  |
| <b>Te</b>   | 0.0000000000000000  | 0.0000000000000000 | 0.6053849760818822  |
| <b>Te</b>   | 0.0000000000000000  | 0.0000000000000000 | 0.7409197255274297  |
| <b>Te</b>   | 0.6666666666666643  | 0.3333333333333357 | 0.4758503169989047  |
| <b>Te</b>   | 0.6666666666666643  | 0.3333333333333357 | 0.3321244998733925  |
| <b>Mo</b>   | 0.6666666666666643  | 0.3333333333333357 | 0.6731941528092252  |

**Table S6.** The lattice vectors and fractional coordinates of each atom in BS/WS<sub>2</sub> heterostructure.

|             |                     |                    |                     |
|-------------|---------------------|--------------------|---------------------|
| <b>a[Å]</b> | 3.0951588450974601  | 0.0000000000000000 | 0.0000000000000000  |
| <b>b[Å]</b> | -1.5475794225487300 | 2.6804861886025053 | 0.0000000000000000  |
| <b>c[Å]</b> | 0.0000000000000000  | 0.0000000000000000 | 24.1960304422211472 |
| <b>B</b>    | 0.0000000000000000  | 0.0000000000000000 | 0.3690562021855335  |
| <b>B</b>    | 0.0000000000000000  | 0.0000000000000000 | 0.4405027181021781  |
| <b>S</b>    | 0.0000000000000000  | 0.0000000000000000 | 0.6061636218422948  |
| <b>S</b>    | 0.0000000000000000  | 0.0000000000000000 | 0.7381540705018932  |
| <b>S</b>    | 0.6666666666666643  | 0.3333333333333357 | 0.4751228124227455  |
| <b>S</b>    | 0.6666666666666643  | 0.3333333333333357 | 0.3343517320684278  |
| <b>W</b>    | 0.6666666666666643  | 0.3333333333333357 | 0.6721189358769150  |

**Table S7.** The lattice vectors and fractional coordinates of each atom in BSe/WSe<sub>2</sub> heterostructure.

|             |                     |                    |                     |
|-------------|---------------------|--------------------|---------------------|
| <b>a[Å]</b> | 3.2770064519373578  | 0.0000000000000000 | 0.0000000000000000  |
| <b>b[Å]</b> | -1.6385032259686789 | 2.8379708357432603 | 0.0000000000000000  |
| <b>c[Å]</b> | 0.0000000000000000  | 0.0000000000000000 | 25.1242898069578331 |
| <b>B</b>    | 0.0000000000000000  | 0.0000000000000000 | 0.3706565381777732  |
| <b>B</b>    | 0.0000000000000000  | 0.0000000000000000 | 0.4388382885539929  |
| <b>Se</b>   | 0.0000000000000000  | 0.0000000000000000 | 0.6051009011058338  |
| <b>Se</b>   | 0.0000000000000000  | 0.0000000000000000 | 0.7392798273107737  |
| <b>Se</b>   | 0.6666666666666643  | 0.3333333333333357 | 0.4762462442490493  |
| <b>Se</b>   | 0.6666666666666643  | 0.3333333333333357 | 0.3331953945310481  |
| <b>W</b>    | 0.6666666666666643  | 0.3333333333333357 | 0.6721528990715236  |



**Table S8.** The lattice vectors and fractional coordinates of each atom in BTe/WTe<sub>2</sub> heterostructure.

|             |                     |                    |                     |
|-------------|---------------------|--------------------|---------------------|
| <b>a[Å]</b> | 3.5568349783877364  | 0.0000000000000000 | 0.0000000000000000  |
| <b>b[Å]</b> | -1.7784174891938682 | 3.0803094483528546 | 0.0000000000000000  |
| <b>c[Å]</b> | 0.0000000000000000  | 0.0000000000000000 | 26.4719454242199603 |
| <b>B</b>    | 0.0000000000000000  | 0.0000000000000000 | 0.3718079123531994  |
| <b>B</b>    | 0.0000000000000000  | 0.0000000000000000 | 0.4364276419561569  |
| <b>Te</b>   | 0.0000000000000000  | 0.0000000000000000 | 0.6048950251004503  |
| <b>Te</b>   | 0.0000000000000000  | 0.0000000000000000 | 0.7411443255818159  |
| <b>Te</b>   | 0.6666666666666643  | 0.3333333333333357 | 0.4762606269909262  |
| <b>Te</b>   | 0.6666666666666643  | 0.3333333333333357 | 0.3319327472929606  |
| <b>W</b>    | 0.6666666666666643  | 0.3333333333333357 | 0.6730018137244858  |

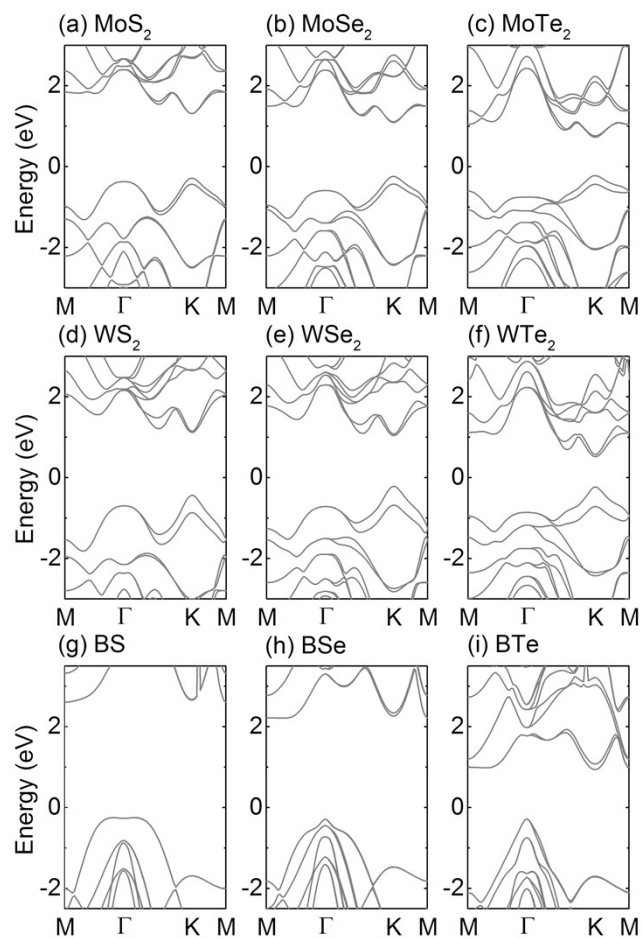

**Fig. S1.** Band structures of pristine  $BX$  and  $MX_2$  ( $M = \text{Mo}$  or  $\text{W}$ ;  $X = \text{S}$ ,  $\text{Se}$  and  $\text{Te}$ ) monolayers obtained with SOC.

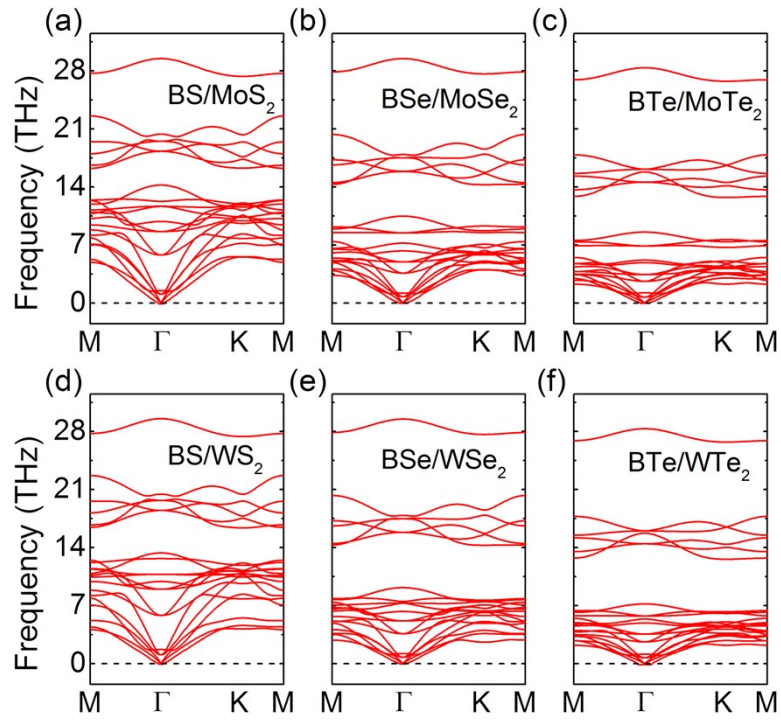

**Fig. S2.** Calculated phonon dispersions of BX/MX<sub>2</sub> heterostructures.

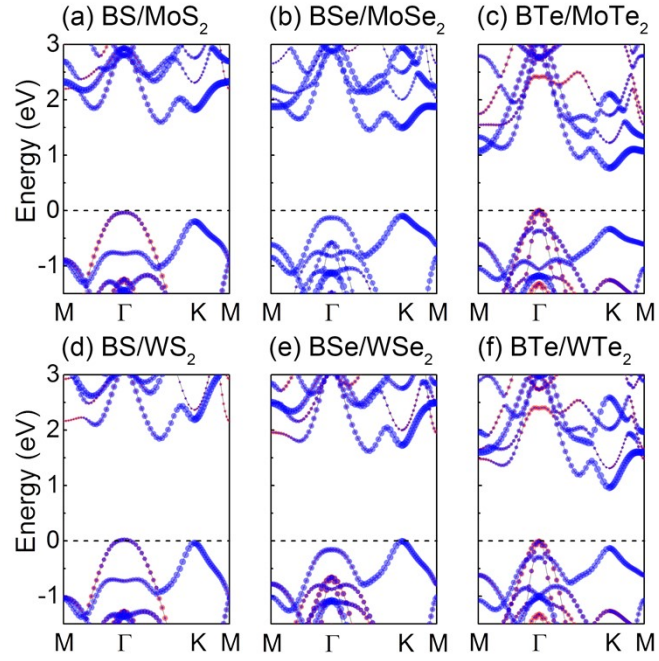

**Fig. S3.** Band structures of the  $BX/MX_2$  heterostructures obtained with optb86-vdW. The size of the circles denotes the projection on  $BX$  (red) and  $MX_2$  (blue). The Fermi level is set to zero.

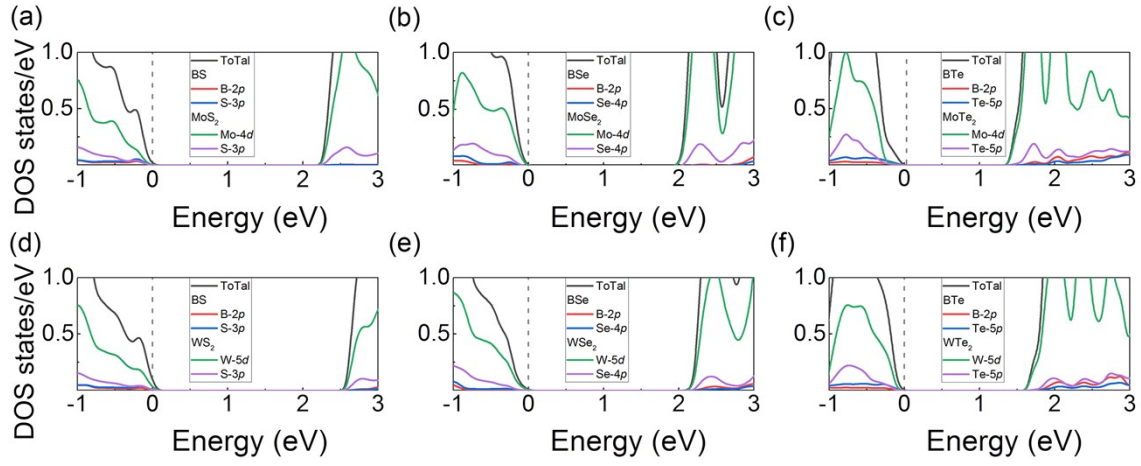

**Fig. S4.** The total density of states (DOS) and the orbital-resolved partial density of states (PDOS) for each atom of  $BX/MX_2$  heterostructures calculated by the HSE06 method. The Fermi level is set to zero.

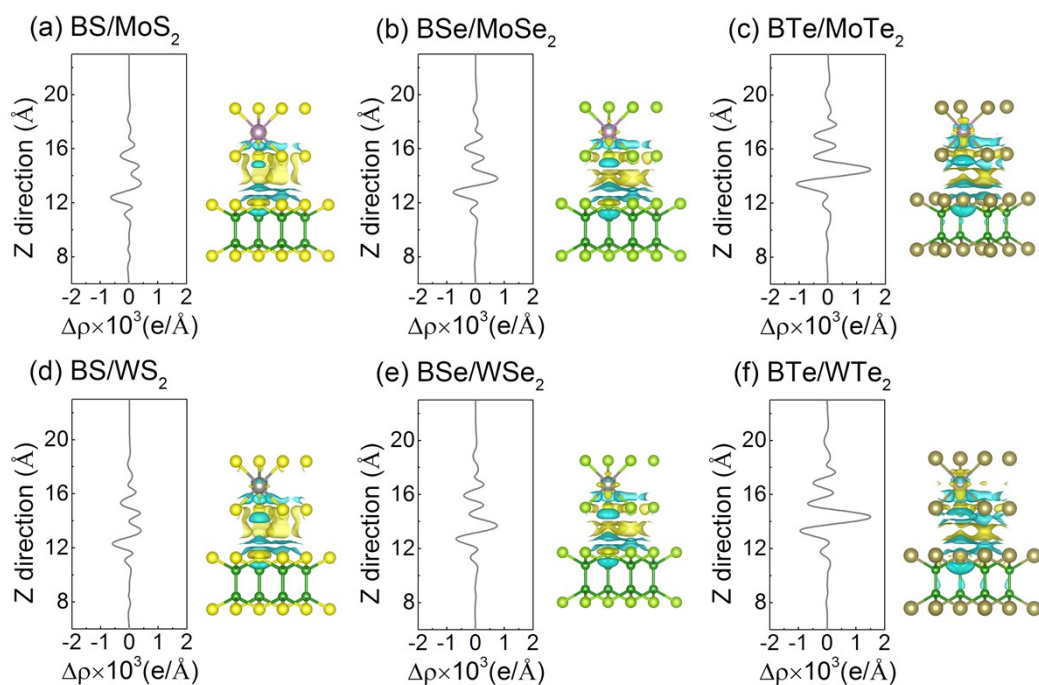

**Fig. S5.** The planar averaged charge-density difference of the  $BX/MX_2$  heterostructures along the out-of-plane direction, and related charge-density difference with an isovalue of  $0.001e \text{ \AA}^{-3}$ . The yellow and cyan regions denote the gain and loss of electrons, respectively.

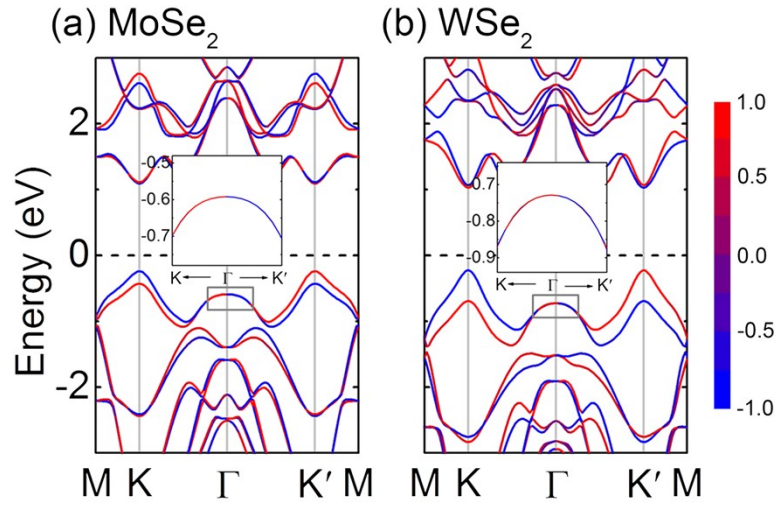

**Fig. S6.** Calculated band structures of pristine (a) MoSe<sub>2</sub> and (b) WSe<sub>2</sub> with SOC. The spin projections along  $z$  direction are represented by red and blue lines, which represent opposite spin states, respectively.

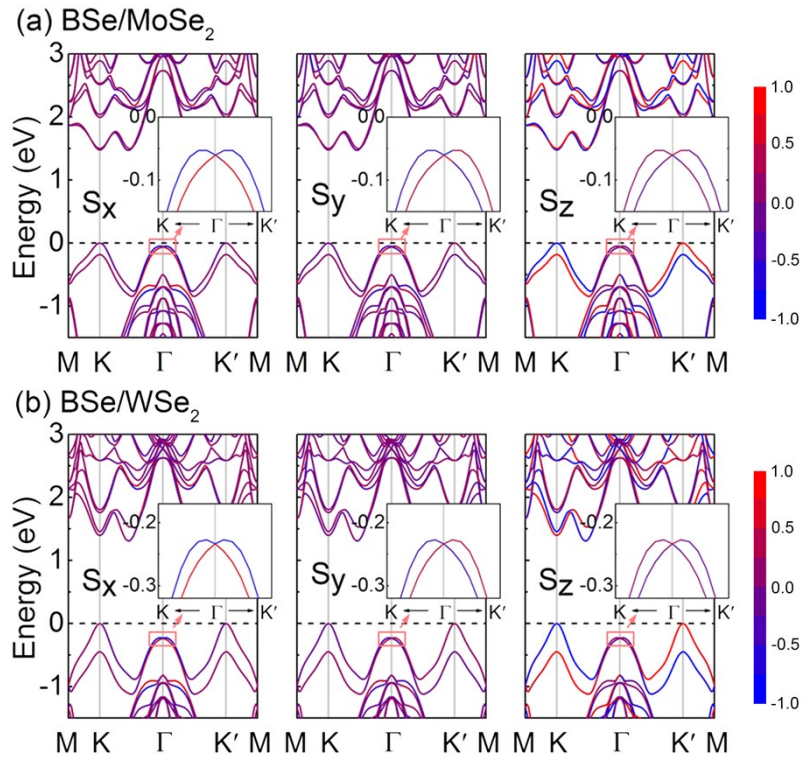

**Fig. S7.** The spin-projected band structures of (a) BSe/MoSe<sub>2</sub> and (b) BSe/WSe<sub>2</sub> heterostructures with SOC. The insets are the magnified band structures around the  $\Gamma$  point. Red and blue lines represent opposite spin states along the projected direction.



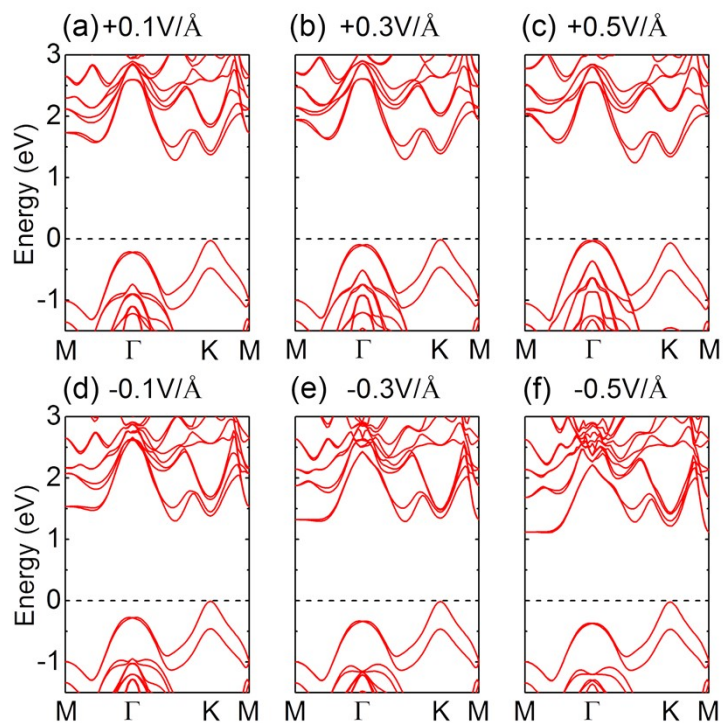

**Fig. S8.** Calculated band structures of the BSe/WSe<sub>2</sub> heterostructure under different electric field from  $-0.5 \text{ V/\AA}$  to  $+0.5 \text{ V/\AA}$ .

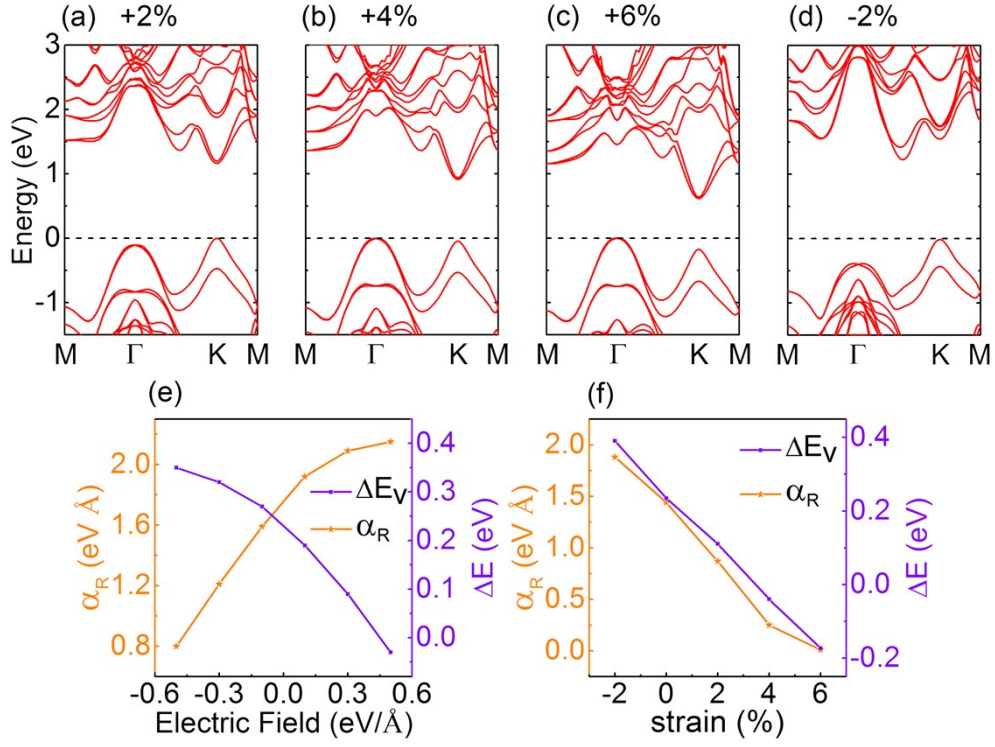

**Fig. S9.** (a)-(d) the band structures of BSe/WSe<sub>2</sub> heterostructure under different strain from -2% to +6%. (e) and (f) corresponding variations of the band edges and Rashba parameters under different electric field and strain.
